# Supplementary material for: Human extracellular vesicles and correlation with two clinical forms of toxoplasmosis
Source: PubMed Central journal article supplement (PMC7054008; doi:10.1371/journal.pone.0229602), 2020-03-03
Supplement: pone.0229602.s009.pdf [file pone.0229602.s009.pdf]

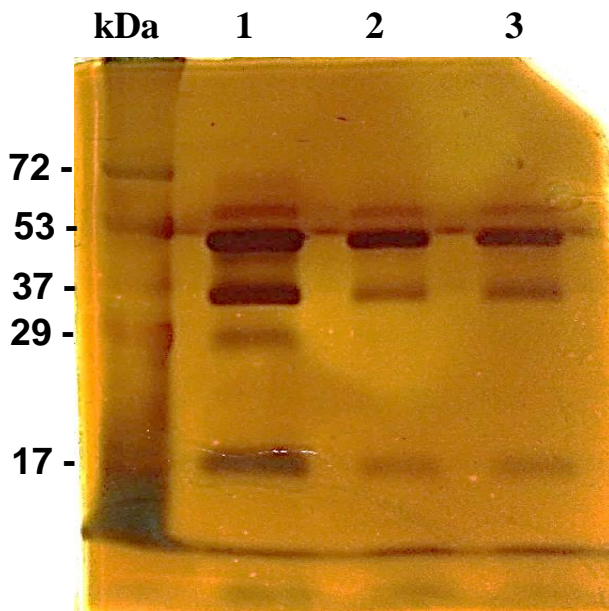

Electrophoresis - Serum-derived EVs separated by 10% SDS-PAGE and stained by silver. Three samples

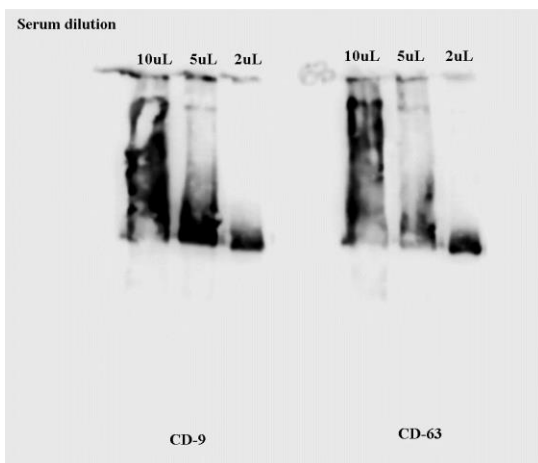

Immunoblot: serum-derived EVs, separated by 10% SDS-PAGE, transferred to nitrocellulose and incubated with anti-CD63 and anti-CD9 antibodies. Three concentrations were used for standardization.
